# Supplementary material
Source: PubMed Central journal article supplement (PMC1691807)
Supplement: 15347522s01.pdf [file 15347522s01.pdf]

These are electronic appendices to the paper by Matthee *et al.* 2004 A phylogenetic review of the African leaf chameleons *Rhampholeon* (Chamaeleonidae): the role of vicariance and climate change in speciation. (*Proc. R. Soc. Lond. B* **271**, pp. 1967-1975. (DOI 10.1098/rspb.2004.2806.))

Electronic appendices are refereed with the text. However, no attempt is made to impose a uniform editorial style on the electronic appendices.

Electronic Appendix A. Taxonomic designation, museum accession numbers and localities of specimens included in the present study. The number of base pairs sequenced for each fragment for each individual is also given as a superscript followed by the Genbank accession number for each sequence.

| Species                    | Museum Accession Numbers | Locality                        | ND2                   | 16S rRNA                | RAG 1                    |
|----------------------------|--------------------------|---------------------------------|-----------------------|-------------------------|--------------------------|
| 1. <i>R. temporalis</i>    | PEM-R 16254              | East Usambara Mtns, Tanzania    | <sup>914</sup> AY5249 | <sup>421</sup> AY524866 | <sup>2781</sup> AY524942 |
| 2. <i>R. temporalis</i>    | PEM-R 16255              | East Usambara Mtns, Tanzania    | <sup>914</sup> AY5249 | <sup>421</sup> AY524867 | <sup>2781</sup> AY524943 |
| 3. <i>R. sp. nova</i>      | PEM-R 16259              | South Pare Mtns, Tanzania       | <sup>914</sup> AY5249 | <sup>422</sup> AY524869 | <sup>2781</sup> AY524945 |
| 4. <i>R. sp. nova</i>      | PEM-R 16260              | South Pare Mtns, Tanzania       | <sup>914</sup> AY5249 | <sup>422</sup> AY524868 | <sup>2781</sup> AY524944 |
| 5. <i>R. brevicaudatus</i> | PEM-R 16257              | East Usambara Mtns, Tanzania    | <sup>914</sup> AY5249 | <sup>420</sup> AY524888 | <sup>2781</sup> AY524963 |
| 6. <i>R. brevicaudatus</i> | PEM-R 16258              | Udzungwa Mtns, Tanzania         | <sup>914</sup> AY5249 | <sup>420</sup> AY524889 | <sup>2781</sup> AY524964 |
| 7. <i>R. brevicaudatus</i> | PEM-R 16256              | East Usambara Mtns, Tanzania    | <sup>914</sup> AY5249 | <sup>420</sup> AY524887 | <sup>2781</sup> AY524962 |
| 8. <i>R. nchisiensis</i>   | PEM-R 16242              | Nchisi Mtn, Malawi              | <sup>914</sup> AY5249 | <sup>423</sup> AY524883 | <sup>2781</sup> AY524958 |
| 9. <i>R. nchisiensis</i>   | PEM-R 16247              | Nyika Plateau, Malawi           | <sup>914</sup> AY5249 | <sup>422</sup> AY524885 | <sup>2781</sup> AY524960 |
| 10. <i>R. nchisiensis</i>  | PEM-R 16241              | Nchisi Mtn, Malawi              | <sup>914</sup> AY5249 | <sup>423</sup> AY524882 | <sup>2781</sup> AY524957 |
| 11. <i>R. nchisiensis</i>  | PEM-R 16248              | Nyika Plateau, Malawi           | <sup>914</sup> AY5249 | <sup>422</sup> AY524884 | <sup>2781</sup> AY524959 |
| 12. <i>R. nchisiensis</i>  | PEM-R 16249              | Nyika Plateau, Zambia           | <sup>914</sup> AY5249 | <sup>423</sup> AY524886 | <sup>2781</sup> AY524961 |
| 13. <i>R. chapmanorum</i>  | PEM-R 16245              | Malawi Hill, Malawi             | <sup>914</sup> AY5249 | <sup>421</sup> AY524881 | <sup>2728</sup> AY524956 |
| 14. <i>R. marshalli</i>    | PEM-R 16243              | Vumba Mtns, Zimbabwe            | <sup>914</sup> AY5249 | <sup>422</sup> AY524870 | <sup>2764</sup> AY524946 |
| 15. <i>R. marshalli</i>    | PEM-R 16244              | Vumba Mtns, Zimbabwe            | <sup>914</sup> AY5249 | <sup>422</sup> AY524871 | <sup>2781</sup> AY524947 |
| 16. <i>R. marshalli</i>    | Not Available            | Unknown                         | <sup>914</sup> AY5249 | <sup>422</sup> AY524872 | <sup>2747</sup> AY524948 |
| 17. <i>R. platyceps</i>    | PEM-R 16251              | Mount Mlanje, Malawi            | <sup>914</sup> AY5249 | <sup>422</sup> AY524879 | <sup>2781</sup> AY524954 |
| 18. <i>R. platyceps</i>    | PEM-R 16250              | Mount Mlanje, Malawi            | <sup>914</sup> AY5249 | <sup>422</sup> AY524880 | <sup>2781</sup> AY524955 |
| 19. <i>R. gorongosae</i>   | PEM-R 16252              | Gorongosa Mtn, Mozambique       | <sup>770</sup> AY5249 | <sup>423</sup> AY524873 | <sup>2747</sup> AY524949 |
| 20. <i>R. gorongosae</i>   | PEM-R 16253              | Gorongosa Mtn, Mozambique       | <sup>727</sup> AY5249 | <sup>423</sup> AY524874 | <sup>2679</sup> AY524950 |
| 21. <i>R. spectrum</i>     | CAS 207683               | Bioko Island, Equatorial Guinea | <sup>914</sup> AY5249 | <sup>421</sup> AY524863 | <sup>2781</sup> AY524938 |
| 22. <i>R. spectrum</i>     | CAS 207682               | Bioko Island, Equatorial Guinea | <sup>914</sup> AY5249 | <sup>421</sup> AY524864 | <sup>2781</sup> AY524939 |
| 23. <i>R. spectrum</i>     | CAS 207688               | Unknown                         | <sup>914</sup> AY5249 | -----                   | <sup>2781</sup> AY524940 |
| 24. <i>R. spectrum</i>     | PEM-R 16262              | Mekambo, Gabon                  | <sup>914</sup> AY5249 | <sup>421</sup> AY524865 | <sup>1480</sup> AY524941 |

|                            |               |                               |                                                                        |
|----------------------------|---------------|-------------------------------|------------------------------------------------------------------------|
| 25. <i>R. kerstenii</i>    | 169939        | Kilifi, Kenya                 | <sup>914</sup> AY5249 <sup>421</sup> AY524890 <sup>335</sup> AY524965  |
| 26. <i>R. kerstenii</i>    | 214834        | Kilifi, Kenya                 | <sup>914</sup> AY5249 <sup>421</sup> AY524891 <sup>2721</sup> AY524966 |
| 27. <i>R. kerstenii</i>    | Not Available | Unknown                       | <sup>914</sup> AY5249 <sup>421</sup> AY524892 <sup>2781</sup> AY524967 |
| 28. <i>R. kerstenii</i>    | Not Available | Mnt Handeni, Tanzania         | <sup>914</sup> AY5249 <sup>421</sup> AY524893 -----                    |
| 29. <i>R. kerstenii</i>    | Not Available | Mnt Handeni, Tanzania         | <sup>914</sup> AY5249 <sup>421</sup> AY524894 -----                    |
| 30. <i>R. boulengeri</i>   | CAS 201682    | Bwindi Forest Reserve, Uganda | <sup>551</sup> AY5249 <sup>421</sup> AY524877 -----                    |
| 31. <i>R. boulengeri</i>   | CAS 201681    | Bwindi Forest Reserve, Uganda | <sup>564</sup> AY5249 <sup>422</sup> AY524878 <sup>2781</sup> AY524953 |
| 32. <i>R. moyeri</i>       | MTSN002TA     | Udzungwa Mtns, Tanzania       | <sup>914</sup> AY5249 <sup>422</sup> AY524875 <sup>2781</sup> AY524951 |
| 33. <i>R. moyeri</i>       | MTSN001TA     | Udzungwa Mtns, Tanzania       | <sup>914</sup> AY5249 <sup>423</sup> AY524876 <sup>2781</sup> AY524952 |
| 34. <i>R. cf. moyeri</i>   | NMZB16934     | Rubeho Mtns, Tanzania         | <sup>914</sup> AY5249 <sup>421</sup> AY524895 -----                    |
| 35. <i>R. uluguruensis</i> | ZMB 48421     | Uluguru Mtns, Tanzania        | <sup>554</sup> AY5249 <sup>422</sup> AY524896 -----                    |
| 36. <i>R. uluguruensis</i> | ZMB 48431     | Uluguru Mtns, Tanzania        | <sup>542</sup> AY5249 <sup>422</sup> AY524897 -----                    |
| 37. <i>R. brachyurus</i>   | PEM-R 16263   | Near Tamota, Tanzania         | <sup>914</sup> AY5249 <sup>421</sup> AY524898 <sup>1892</sup> AY524968 |
| 38. <i>R. brachyurus</i>   | PEM-R 16264   | Near Tamota, Tanzania         | <sup>914</sup> AY5249 <sup>421</sup> AY524899 <sup>1892</sup> AY524969 |

## Electronic Appendix B

Custom made internal forward and reverse RAG1 primers with numbers referring to the position of the 3' end of the primer with respect to the corresponding nucleotide in the published *Gallus gallus* sequence (Carlson *et al.* 1991)

| Primer Name | Primer Sequence         |
|-------------|-------------------------|
| F83b        | TCnGAATGGAArTTyAArCTnTT |
| F118        | TTGGAAAACtACTTCCTGAA    |
| F624        | GAGTGGCTTCCCCATTCAyC    |
| R638        | CAYGGAAGGAAGTGGYAC      |
| F964        | AAATGCATCAAAGTGATGGG    |
| F1457a      | TGTAGCCArTACCATAAAATGTA |
| R1067       | AAAATGACCTCCTCCTGGCAA   |
| F1989       | TGCCTTATGCTGGCTGATGAA   |
| R2165       | ACAAATGTAAGTAGATCCTG    |
| F2568a      | GGATGAATGGrAATTTTGCCAGA |
| R2911       | TTGTTCCcAGATTCATTTCCC   |

Electronic Appendix C

(A) Morphological characterization and diagnosis of *Rhampholeon* and *Rieppeleon*, (B) Morphological characterization and diagnosis of subgenera *Rhampholeon*, *Bicuspis* and *Rhinodigitum*.

| A) Type I <i>Rieppeleon</i>                                                                                                                                                                                                                                                                                                                                                                                                                                                                                                                                                                                                                                                                                                                                                            | Type II <i>Rhampholeon</i>                                                                                                                                                                                                                                                                                                                                                                                                                                                                                                                                                                                                                                                                                                                                                                                                                                                                                                                    |
|----------------------------------------------------------------------------------------------------------------------------------------------------------------------------------------------------------------------------------------------------------------------------------------------------------------------------------------------------------------------------------------------------------------------------------------------------------------------------------------------------------------------------------------------------------------------------------------------------------------------------------------------------------------------------------------------------------------------------------------------------------------------------------------|-----------------------------------------------------------------------------------------------------------------------------------------------------------------------------------------------------------------------------------------------------------------------------------------------------------------------------------------------------------------------------------------------------------------------------------------------------------------------------------------------------------------------------------------------------------------------------------------------------------------------------------------------------------------------------------------------------------------------------------------------------------------------------------------------------------------------------------------------------------------------------------------------------------------------------------------------|
| <p>The hemipenes are acalyculate but have a quadruple apical ornamentation (<i>R. kerstenii</i> (Klaver &amp; Böhme 1986) and <i>R. brachyurus</i> (Tilbury pers obs) or none at all (<i>R. brevicaudatus</i>). Parietal bone trigonal, tapering posteriorly into a thin posterior saggital crest. Parietal peritoneum unpigmented. The snout is smooth with no rostral process. Supra-optic peak bony. Plantar surface covered with acuminate spines, claws weakly bicuspid. No accessory plantar spines present. A thin lateral flank ridge of tubercles is present and body pattern of horizontal stripes. The tail may be very truncated as in <i>Ri. brachyurus</i> (average of 14% of total length), to relatively long in <i>Ri. kerstenii</i> (up to 40% of total length).</p> | <p><i>Rhampholeon</i> are characterised by the possession of variably developed soft, scaly rostral processes, variably developed plantar accessory spines, smooth “cobblestoned” plantar surfaces, claws either strongly bicuspid or simple, a soft (or absent) supra-optic peak, and a leaf-vein pattern of two to three oblique side-stripes. The hemipenes are acalyculate in most of the taxa except for two of the described species (<i>R. spectrum</i> and <i>R. temporalis</i>) where truncal calyces are present. The hemipenal apex has dual ornamentation in all, although in those with truncal calyces the ornamentation is rather more complex than simple curved papillate horns. In a representative from each of the three Type II sub-genera as discussed below (<i>spectrum</i>, <i>nchisiensis</i> and <i>marshalli</i>), the parietal bone is trigonal but without the posterior saggital extension (Rieppel 1987).</p> |

(B)

| <i>Rhampholeon</i>                                                                                                                                                                                                                                                                          | <i>Bicuspis</i>                                                                                                                                                                                                                                                                                                                                                                                                                                                                                                                                                                                                                                                                                   | <i>Rhinodigitum</i>                                                                                                                                                                                                                                                                                                                                                                          |
|---------------------------------------------------------------------------------------------------------------------------------------------------------------------------------------------------------------------------------------------------------------------------------------------|---------------------------------------------------------------------------------------------------------------------------------------------------------------------------------------------------------------------------------------------------------------------------------------------------------------------------------------------------------------------------------------------------------------------------------------------------------------------------------------------------------------------------------------------------------------------------------------------------------------------------------------------------------------------------------------------------|----------------------------------------------------------------------------------------------------------------------------------------------------------------------------------------------------------------------------------------------------------------------------------------------------------------------------------------------------------------------------------------------|
| <p>Parietal peritoneum unpigmented, hemipenal truncus with prominent calyces, apex with dual papillate horns or rotulae, claws either simple or strongly bicuspid, rostral process rudimentary to prominent, tail relatively long averaging &gt;30% of the total length in adult males.</p> | <p>Loveridge (1956) proposed the monotypic sub-genus <i>Chamaeleo</i> (<i>Bicuspis</i>) for <i>marshalli</i> based on its morphological peculiarities believing the species to bridge the morphological gap between <i>Chamaeleo</i> and <i>Rhampholeon</i>. Broadley (1971) suppressed <i>Bicuspis</i> after an objective assessment that placed <i>marshalli</i> unequivocally as a species of <i>Rhampholeon</i>. The two species in this sub-genus have densely pigmented parietal peritoneum, an acalyculate hemipenal truncus with dual bifid apical horns, strongly bicuspid claws, a variably developed rostral process, and a tail averaging &gt;35% of total length in adult males.</p> | <p>The hemipenis is short, almost bag-like, acalyculate and adorned with a pair of simple apical “horns” with a variable number of thorn-like papillae arranged on the outer aspect of the horn. Parietal peritoneum unpigmented, claws strongly bicuspid, plantar surfaces smooth, rostral process variably developed, and tail short averaging &lt;27% of total length in adult males.</p> |
